# Supplementary figures and images for: Resistance of the target islet tissue to autoimmune destruction contributes to genetic susceptibility in Type 1 diabetes
Source: Springer Nature journal article supplement (doi:10.1186/1745-6150-2-5), 2007-01-25

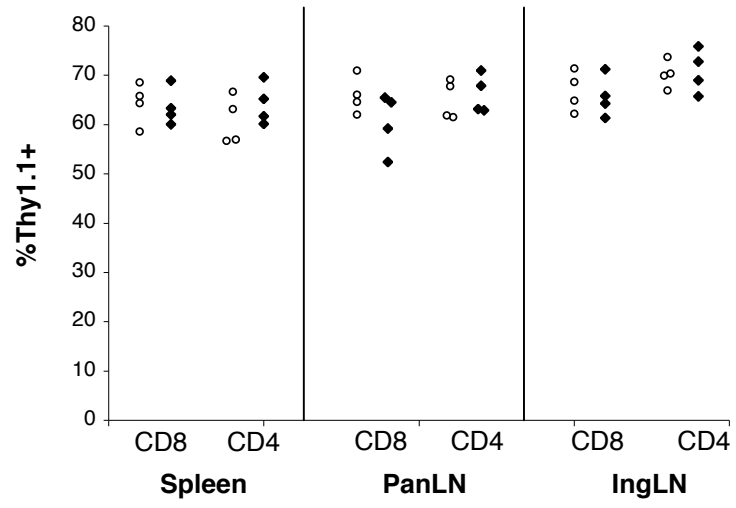

Supplement: Additional file 1 [file 1745-6150-2-5-s1.pdf]
